# Supplementary material
Source: PubMed Central journal article supplement (PMC4201348)
Supplement: cb5006454_si_001.pdf [file cb5006454_si_001.pdf]

**Supporting Information for “Synthetic Antibodies with a Human Framework that Protect Mice from Lethal Sudan Ebolavirus Challenge”**

*Gang Chen,<sup>1,#</sup> Jayne F. Koellhoffer,<sup>2,#</sup> Samantha E. Zak,<sup>3,#</sup> Julia C. Frei,<sup>2</sup> Nina Liu,<sup>2</sup> Hua Long,<sup>1</sup> Wei Ye,<sup>1</sup> Kaajal Nagar,<sup>1</sup> Guohua Pan,<sup>1</sup> Kartik Chandran,<sup>4</sup> John M. Dye,<sup>3,\*</sup> Sachdev S. Sidhu,<sup>1,\*</sup> and Jonathan R. Lai<sup>2,\*</sup>*

<sup>1</sup> Banting and Best Department of Medical Research, Terrence Donnelly Centre for Cellular and Biomolecular Research, University of Toronto, 160 College Street, Toronto, ON, Canada M5S 3E1

<sup>2</sup> Department of Biochemistry, Albert Einstein College of Medicine, 1300 Morris Park Avenue, Bronx, NY, USA 10461

<sup>3</sup> Virology Division, United States Army Medical Research Institute of Infectious Diseases, 1425 Porter Street, Fort Detrick, MD, USA 21702

<sup>4</sup> Department of Microbiology and Immunology, Albert Einstein College of Medicine, 1300 Morris Park Avenue, Bronx, NY, USA 10461

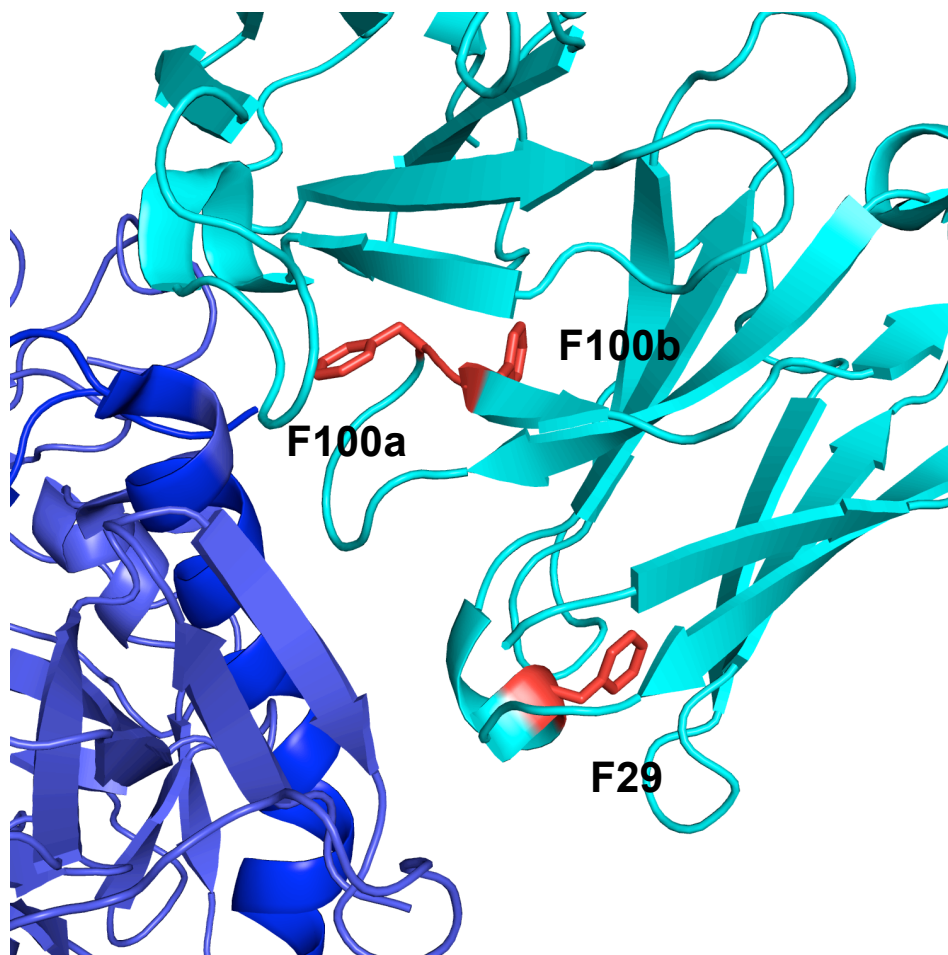

**Figure S1 Potential Role of 16F6 residues F29, F100a, and F100b in supporting or direct interactions with SUDV GP.** 16F6 shown in cyan and SUDV in blue. F29 and F100b point toward the domain core and likely support loop conformations required for interaction with SUDV GP. F100a points directly toward the antigen and is likely important for direct contacts.

## Sequences of antibodies characterized for neutralization potential

**Note: A spurious Asn->Lys mutation was observed at position 52 (CDR-H2) of F4. This was caused by a single nucleotide mutation at the wobble position (AAC->AAG). This position is underlined below.**

### HEAVY CHAIN SEQUENCES:

|        | 1     | 11      | 21        | 31     | 41       |        |        |
|--------|-------|---------|-----------|--------|----------|--------|--------|
| 16F6 : | EVQLV | ESGGGLV | TPGGSLKLS | CAASGF | AFNYDDMF | WVRQNT | TEKRLE |
| YADS1: |       | Q       | R         | DIYDD  | IH       | APG    | G      |
| E10 :  |       | Q       | R         |        | IH       | APG    | G      |
| F4 :   |       | Q       | R         |        |          | APG    | G      |
| 31C7 : |       | Q       | R         |        |          | APG    | G      |
| 31E3 : |       | Q       | R         |        |          | APG    | G      |
| 31F8 : |       | Q       | R         |        |          | APG    | G      |
| 31G11: |       | Q       | R         |        |          | APG    | G      |
| 34F5 : |       | Q       | R         |        |          | APG    | G      |
| 35A1 : |       | Q       | R         |        |          | APG    | G      |
| 35B5 : |       | Q       | R         |        |          | APG    | G      |
| 41C6 : |       | Q       | R         |        | H        | APG    | G      |
| 41F10: |       | Q       | R         |        | LH       | APG    | G      |
| 42F2 : |       | Q       | R         |        |          | APG    | G      |
| 51B6 : |       | Q       | R         |        | LY       | APG    | G      |
| 51F7 : |       | Q       | R         |        |          | APG    | G      |
| 52D11: |       | Q       | R         |        |          | APG    | G      |
| 52F2 : |       | Q       | R         |        | H        | APG    | G      |

|        | 52         | 60      | 70   | 80      | 82b   | 87       |       |       |
|--------|------------|---------|------|---------|-------|----------|-------|-------|
| 16F6 : | WVAYIN     | SGGGNT  | YYPD | TVKGRFT | ISRDN | AKKTLFLQ | MSSLR | SEDTA |
| YADS1: | APSY       | Y D A S |      | A TS    | N AY  | N        | A     |       |
| E10 :  | P          | A S     |      | A TS    | N AY  | N        | A     |       |
| F4 :   | <u>K</u> P | A S     |      | A TS    | N AY  | N        | A     |       |
| 31C7 : | P          | A S     |      | A TS    | N AY  | N        | A     |       |
| 31E3 : | P          | S       |      | A TS    | N AY  | N        | A     |       |
| 31F8 : |            | A S     |      | A TS    | N AY  | N        | A     |       |
| 31G11: | P          | S       |      | A TS    | N AY  | N        | A     |       |
| 34F5 : |            | S       |      | A TS    | N AY  | N        | A     |       |
| 35A1 : | P          | S       |      | A TS    | N AY  | N        | A     |       |
| 35B5 : |            | S       |      | A TS    | N AY  | N        | A     |       |
| 41C6 : | P          | A S     |      | A TS    | N AY  | N        | A     |       |
| 41F10: | P          | A S     |      | A TS    | N AY  | N        | A     |       |
| 42F2 : | P          | S       |      | A TS    | N AY  | N        | A     |       |
| 51B6 : | P          | S       |      | A TS    | N AY  | N        | A     |       |
| 51F7 : |            | S       |      | A TS    | N AY  | N        | A     |       |
| 52D11: | P          | S       |      | A TS    | N AY  | N        | A     |       |
| 52F2 : | P          | A S     |      | A TS    | N AY  | N        | A     |       |

|        | 97     | abcde     |         |     |    |
|--------|--------|-----------|---------|-----|----|
| 16F6 : | MYYCAR | QLYGNS--- | FFDYWGQ | TS  | LV |
| YADS1: | V      | S         | SSDASYS | SAM | LV |
| E10 :  | V      |           | M       |     | LV |
| F4 :   | V      |           |         |     | LV |
| 31C7 : | V      |           | L       |     | LV |
| 31E3 : | V      |           |         |     | LV |
| 31F8 : | V      |           |         |     | LV |
| 31G11: | V      |           |         |     | LV |
| 34F5 : | V      |           |         |     | LV |
| 35A1 : | V      |           |         |     | LV |
| 35B5 : | V      |           |         |     | LV |
| 41C6 : | V      |           |         |     | LV |
| 41F10: | V      |           |         |     | LV |
| 42F2 : | V      |           |         |     | LV |
| 51B6 : | V      |           |         |     | LV |
| 51F7 : | V      |           |         |     | LV |
| 52D11: | V      |           |         |     | LV |
| 52F2 : | V      |           | M       |     | LV |

LIGHT CHAIN SEQUENCES:

|        | 1                                             | 11     | 21 | 31    | 41 |
|--------|-----------------------------------------------|--------|----|-------|----|
| 16F6 : | DIVMTQSHKFMSTSVGDRVTITCKASQDVTTAVAWYQQKPGHSPK |        |    |       |    |
| YADS1: | Q                                             | PSSL A | R  | ASYSS | KA |
| E10 :  | Q                                             | PSSL A | R  |       | KA |
| F4 :   | Q                                             | PSSL A |    |       | KA |
| 31C7 : | Q                                             | PSSL A |    |       | KA |
| 31E3 : | Q                                             | PSSL A |    |       | KA |
| 31F8 : | Q                                             | PSSL A |    |       | KA |
| 31G11: | Q                                             | PSSL A |    |       | KA |
| 34F5 : | Q                                             | PSSL A |    |       | KA |
| 35A1 : | Q                                             | PSSL A | Q  |       | KA |
| 35B5 : | Q                                             | PSSL A |    |       | KA |
| 41C6 : | Q                                             | PSSL A |    |       | KA |
| 41F10: | Q                                             | PSSL A |    |       | KA |
| 42F2 : | Q                                             | PSSL A |    |       | KA |
| 51B6 : | Q                                             | PSSL A |    |       | KA |
| 51F7 : | Q                                             | PSSL A |    |       | KA |
| 52D11: | Q                                             | PSSL A |    |       | KA |
| 52F2 : | Q                                             | PSSL A | Q  |       | KA |

|        | 51                                          | 61  | 71 | 81           |
|--------|---------------------------------------------|-----|----|--------------|
| 16F6 : | LIYWASTRHTGVPDRFTGSGSGTAFTLLNSVQAEDLALYYCQQ |     |    |              |
| YADS1: | A YLYS                                      | S S | D  | IS L P F T - |
| E10 :  | RLHN                                        | S S | D  | IS L P F T   |
| F4 :   |                                             | S S | D  | IS L P F T   |
| 31C7 : | S YP                                        | S S | D  | IS L P F T   |
| 31E3 : | G YI                                        | S S | D  | IS L P F T   |
| 31F8 : |                                             | S S | D  | IS L P F T   |
| 31G11: | S Y                                         | S S | D  | IS L P F T   |
| 34F5 : | A R                                         | S S | D  | IS L P F T   |
| 35A1 : | SL F                                        | S S | D  | IS L P F T   |
| 35B5 : |                                             | S S | D  | IS L P F T   |
| 41C6 : |                                             | S S | D  | IS L P F T   |
| 41F10: |                                             | S S | D  | IS L P F T   |
| 42F2 : |                                             | S S | D  | IS L P F T   |
| 51B6 : |                                             | S S | D  | IS L P F T   |
| 51F7 : |                                             | S S | D  | IS L P F T   |
| 52D11: | FL R                                        | S S | D  | IS L P F T   |
| 52F2 : | G K                                         | S S | D  | IS L P F T   |

|        | 91               | 101   |
|--------|------------------|-------|
| 16F6 : | HYSTPLTFGAGTKLFL |       |
| YADS1: | SSAS A           | Q V I |
| E10 :  |                  | Q VEI |
| F4 :   |                  | Q VEI |
| 31C7 : |                  | Q VEI |
| 31E3 : |                  | Q VEI |
| 31F8 : |                  | Q VEI |
| 31G11: |                  | Q VEI |
| 34F5 : |                  | Q VEI |
| 35A1 : |                  | Q VEI |
| 35B5 : |                  | Q VEI |
| 41C6 : |                  | Q VEI |
| 41F10: |                  | Q VEI |
| 42F2 : |                  | Q VEI |
| 51B6 : |                  | Q VEI |
| 51F7 : |                  | Q VEI |
| 52D11: |                  | Q VEI |
| 52F2 : |                  | Q VEI |
